# Supplementary material
Source: Springer Nature journal article supplement (https://www.springermedizin.de/resource/supplementary/12884_2014_1093_MOESM4_ESM.pdf/9458902)
Supplement: MOESM4 [file 9458902]

Type of delivery

■ Vaginal  
■ Cesarean

| Node 0   |       |        |
|----------|-------|--------|
| Category | %     | n      |
| Vaginal  | 69,7  | 148917 |
| Cesarean | 30,3  | 64622  |
| Total    | 100,0 | 213539 |

Repeat CD  
Improvement=0,099

Yes

| Node 1   |      |       |
|----------|------|-------|
| Category | %    | n     |
| Vaginal  | 6,9  | 1637  |
| Cesarean | 93,1 | 22059 |
| Total    | 11,1 | 23696 |

No

| Node 2   |      |        |
|----------|------|--------|
| Category | %    | n      |
| Vaginal  | 77,6 | 147280 |
| Cesarean | 22,4 | 42563  |
| Total    | 88,9 | 189843 |

Mal-position/Mal-presentation  
Improvement=0,054

No

| Node 3   |      |        |
|----------|------|--------|
| Category | %    | n      |
| Vaginal  | 82,0 | 146195 |
| Cesarean | 18,0 | 32059  |
| Total    | 83,5 | 178254 |

Yes

| Node 4   |      |       |
|----------|------|-------|
| Category | %    | n     |
| Vaginal  | 9,4  | 1085  |
| Cesarean | 90,6 | 10504 |
| Total    | 5,4  | 11589 |

Abruptio placentae/Placenta previa  
Improvement=0,012

No

| Node 5   |      |        |
|----------|------|--------|
| Category | %    | n      |
| Vaginal  | 82,9 | 146070 |
| Cesarean | 17,1 | 30036  |
| Total    | 82,5 | 176106 |

Yes

| Node 6   |      |      |
|----------|------|------|
| Category | %    | n    |
| Vaginal  | 5,8  | 125  |
| Cesarean | 94,2 | 2023 |
| Total    | 1,0  | 2148 |

Pluriparity  
Improvement=0,010

Yes

| Node 7   |      |       |
|----------|------|-------|
| Category | %    | n     |
| Vaginal  | 92,2 | 65538 |
| Cesarean | 7,8  | 5506  |
| Total    | 33,3 | 71044 |

No

| Node 8   |      |        |
|----------|------|--------|
| Category | %    | n      |
| Vaginal  | 76,7 | 80532  |
| Cesarean | 23,3 | 24530  |
| Total    | 49,2 | 105062 |

Fetal weight  
Improvement=0,005

NW; OW

| Node 9   |      |       |
|----------|------|-------|
| Category | %    | n     |
| Vaginal  | 78,5 | 77744 |
| Cesarean | 21,5 | 21325 |
| Total    | 46,4 | 99069 |

LW; VLW

| Node 10  |      |      |
|----------|------|------|
| Category | %    | n    |
| Vaginal  | 46,5 | 2788 |
| Cesarean | 53,5 | 3205 |
| Total    | 2,8  | 5993 |
